# Supplementary material
Source: publisher figshare collection journal article supplement (https://gsapubs.figshare.com/ndownloader/files/22410162)
Supplement: Supplementary file 1 [file 22410162]

## Sheet: AMS data
			Purdue Rare Isotope Measurement Lab
			Purdue University, West Lafayette, IN 47907, USA
			Marc Caffee, Director
			www.primelab.purdue.edu
Date:	2014-11-25
Significant Digits: If leading digit in uncertainty is 1 or 2 retain 2 digits otherwise retain 1. Ratios have same number of digits as corresponding uncertainty.
Notes: (A) Low Current; (B) High Interference – at least two measurements unusable
References: Sharma P., et al (1990). Nucl. Inst. And Meth. B, 52(3-4), 410-415.	K. Nishiizumi, et al (2007). Nucl Inst and Meth B 258, 403–413.
Prepared by: Thomas Woodruff		woodruft@purdue.edu
ID	Name	10Be/9Be (10-15)	Uncertainty (10-15)	Avg. 9Be Current (nanoAmps)	Notes
201403355	58-GVLCI2-36-1	1318.7	32.2289	4039							0.0244399
201403356	58-GVLCI2-36-2	541.607	12.3625	4181							0.0228256
201403357	58-GVLCI2-37-1	518.268	13.1461	4504							0.0253654
201403358	58-GVLCI2-38-1	159.393	6.05782	3814							0.0380056
201403359	58-Blank-A	1.15527	0.516936	4275							0.447459

## Sheet: ratio to atoms
sample	raw ratio	error	bkg-corrected ratio	ratio error	error (%)	carrier conc.	carrier added (g)	quartz	grams of 9Be	9Be atoms	10Be atoms	10Be atoms/g	± atoms/g
58-GVLCI2-36-1	1318.7	32.23	1.31754e-12	3.223e-14	0.0244623	405.4	0.5992	22.6698	0.000242916	1.62321e+19	2.13865e+07	943390	23077.4
58-GVLCI2-36-2	541.61	12.36	5.4045e-13	1.236e-14	0.0228698	405.4	0.5984	14.8357	0.000242591	1.62104e+19	8.76093e+06	590531	13505.3
58-GVLCI2-37-1	518.27	13.15	5.1711e-13	1.315e-14	0.0254298	405.4	0.6024	19.7901	0.000244213	1.63188e+19	8.43862e+06	426406	10843.4
58-GVLCI2-38-1	159.39	6.06	1.5823e-13	6.06e-15	0.0382987	405.4	0.6011	8.7886	0.000243686	1.62836e+19	2.57655e+06	293170	11228
58-Blank-A	1.16	0.52
			1.32 ± 0.32			0.4054	0.242916
			5.40 ± 0.12			0.4054	0.242591
			5.17 ± 0.13			0.4054	0.244213
			1.58 ± 0.06			0.4054	0.243686

## Sheet: CRONUS input
sample	lat	long	elevation	air pressure	thickness	density	shielding	erosion	[Be]	[Be] unc.	Be std	[Al]	[Al] unc.	Al std
58-GVLCI2-36-1	38.3814	116.072	1818	std	5	2.65	0.896	0	943390	23077.4	07KNSTD	0	0	KNSTD
58-GVLCI2-36-2	38.3814	116.072	1818	std	2.5	2.65	0.896	0	590531	13505.3	07KNSTD	0	0	KNSTD
58-GVLCI2-37-1	38.371	116.064	1843	std	1.5	2.65	1	0	426406	10843.4	07KNSTD	0	0	KNSTD
58-GVLCI2-38-1	38.3888	116.069	1838	std	2	2.65	1	0	293170	11228	07KNSTD	0	0	KNSTD
	38	22.886	0.381433	116	4.335	0.07225		38.3814	116.072
	38	22.258	0.370967	116	3.835	0.0639167		38.371	116.064
	38	23.33	0.388833	116	4.116	0.0686		38.3888	116.069
samples 36-1, 36-2				sample 38-1
Shielding calculation				Shielding calculation
Sector of horizon	Shielded elevation	Fraction		Sector of horizon	Shielded elevation	Fraction
(must total 360 degrees)	(degrees)	of flux		(must total 360 degrees)	(degrees)	of flux
90	50	0.146252		60	8	0.166418
30	10	0.0830753		300	0	0.833333
240	0	0.666667		0	0	0
0	0	0		0	0	0
0	0	0		0	0	0
0	0	0		0	0	0
total must = 360		shielding factor		total must = 360		shielding factor
360		0.895994		360		0.999751

## Sheet: CRONUS output
CRONUS-Earth 10Be - 26Al exposure age calculator -- results
Version information --	Component	Version
	Wrapper script:	2.2
	Main calculator:	2.1
	Constants:	2.2.1
	Muons:	1.1
Comments:
Production rate calibration information:	Using user-supplied calibration data set
	Name: Balco et al 2009 NE North America
	Trace string: Calc date: 15-Oct-2013 Versions: Cal 2.2-cal-dev P10fit 2.2-dev Get-age 2.1 Muons 1.1 Consts 2.2.1
10Be results:
Results not dependent on spallogenic production rate model:					Exposure ages -- constant production rate model:
					Scaling scheme for spallation: Lal(1991) / Stone(2000)
Sample name	Thickness	Shielding	Production rate	Internal	Exposure age	External	Production rate
	scaling	factor	(muons)	uncertainty	(yr)	uncertainty	(spallation)
	factor		(atoms/g/yr)	(yr)		(yr)	(atoms/g/yr)
58-GVLCI2-36-1	0.9597	0.896	0.325	1797	72155	3956	12.99	±		58-GVLCI2-36-1	72155±3956
58-GVLCI2-36-2	0.9796	0.896	0.327	1016	43956	2362	13.26	±		58-GVLCI2-36-2	43956±2362
58-GVLCI2-37-1	0.9877	1	0.331	709	27681	1513	15.18	±		58-GVLCI2-37-1	27681±1513
58-GVLCI2-38-1	0.9836	1	0.33	736	19127	1180	15.07	±		58-GVLCI2-38-1	19127±1180
Exposure ages -- time-varying production models:
Scaling scheme	Desilets and others		Dunai		Lifton and others		Time-dependent
for spallation:	-20032006		-2001		-2005		Lal (1991)/Stone (2000)
Sample name	Exposure age	External	Exposure age	External	Exposure age	External	Exposure age	External
	(yr)	uncertainty (yr)	(yr)	uncertainty (yr)	(yr)	uncertainty (yr)	(yr)	uncertainty (yr)
58-GVLCI2-36-1	64755	3591	63946	3551	63613	3522	66865	3685
58-GVLCI2-36-2	39586	2154	39260	2139	38962	2117	40723	2201
58-GVLCI2-37-1	26006	1440	25857	1434	25745	1424	26655	1466
58-GVLCI2-38-1	18441	1149	18480	1153	18308	1139	18800	1165
26Al results:
Results not dependent on spallogenic production rate model:					Exposure ages -- constant production rate model:
					Scaling scheme for spallation: Lal(1991) / Stone(2000)
Sample name	Thickness	Shielding	Production rate	Internal	Exposure age	External	Production rate
	scaling	factor	(muons)	uncertainty	(yr)	uncertainty	(spallation)
	factor		(atoms/g/yr)	(yr)		(yr)	(atoms/g/yr)
58-GVLCI2-36-1	--	--	--	--	--	--	--
58-GVLCI2-36-2	--	--	--	--	--	--	--
58-GVLCI2-37-1	--	--	--	--	--	--	--
58-GVLCI2-38-1	--	--	--	--	--	--	--
Exposure ages -- time-varying production models:
Scaling scheme	Desilets and others		Dunai		Lifton and others		Time-dependent
for spallation:	-20032006		-2001		-2005		Lal (1991)/Stone (2000)
Sample name	Exposure age	External	Exposure age	External	Exposure age	External	Exposure age	External
	(yr)	uncertainty (yr)	(yr)	uncertainty (yr)	(yr)	uncertainty (yr)	(yr)	uncertainty (yr)
58-GVLCI2-36-1	--	--	--	--	--	--
58-GVLCI2-36-2	--	--	--	--	--	--
58-GVLCI2-37-1	--	--	--	--	--	--
58-GVLCI2-38-1	--	--	--	--	--	--
(No Al-26 / Be-10 plot)	26Al/10Be ratios (relative to 07KNSTD!):
	Sample	26Al/10Be
		ratio
	58-GVLCI2-36-1	--
	58-GVLCI2-36-2	--
	58-GVLCI2-37-1	--
	58-GVLCI2-38-1	--

## Sheet: input for CRONUS Calc website
	CRONUS Earth 10Be/26Al Web Calculator Data Entry Template
	Data can be entered in this file and then selected and copied directly into the online calculator
Sample Name	Scaling	Latitude	Longitude	Elevation	Pressure	Atmospheric Pressure or Elevation(Select One)	Sample Thickness	Bulk Density	Shielding Factor	Erosion Rate	Conc. 10Be	10Be Standardization	Conc. 26Al	26Al Standardization	Attenuation length	Depth to Top of Sample	Year Collected	Latitude Uncertainty	Longitude Uncertainty	Elevation Uncertainty	Pressure Uncertainty	Sample Thickness Uncertainty	Bulk Density Uncertainty	Shielding Factor Uncertainty	Erosion-Rate Uncertainty	Conc. 10Be Uncertainty	Conc. 26Al Uncertainty	Attenuation Length Uncertainty	Depth to Top of Sample Uncertainty	Year Collected Uncertainty
	(Select One of the Following)	decimal degrees	decimal degrees	meters	hPa	(Select One of the Following)	cm	g/cm^3	unitless	mm/kyr	Atoms/g of sample	(Select One of the Following)	Atoms/g of sample	(Select One of the Following)	g/cm^2	g/cm^2	Year A.D.	decimal degrees	decimal degrees	meters	hPa	cm	g/cm^3	unitless	mm/kyr	Atoms/g of sample	Atoms/g of sample	g/cm^2	g/cm^2	Year A.D.
An identifying sample name	DE - Desilets and Zreda DU - Dunai time dependent scaling LI - Lifton LM - Lal/Stone time dependent scaling SA - Lifton-Sato-Dunai nuclide and time dependent scaling SF - Lifton-Sato-Dunai flux time dependent ST - Lal/Stone time independent					Elevation Pressure Both			for terrain, snow, etc.		atoms of 10-Be per gram of sample	07KNSTD, KNSTD, NIST_Certified, NIST_30000, NIST_30200, NIST_30300, NIST_30600, NIST_27900, S555, S2007, BEST433, BEST433N, S555N, S2007N, LLNL31000, LLNL10000, LLNL3000, LLNL1000, LLNL30	atoms of 26-Al per gram of sample	KNSTD, AL09, ZAL94, ZAL94N, SMAL11, Z92_0222, None
Sample name	Scaling	Latitude	Longitude	Elevation		Elv/pressure	Thickness	Density	Shielding	Erosion rate	[Be-10]	Be AMS	[Al-26]	Al AMS	Attenuation length	Depth to Top of Sample	Year Collected	Latitude Uncertainty	Longitude Uncertainty	Elevation Uncertainty	Pressure Uncertainty	Sample Thickness Uncertainty	Bulk Density Uncertainty	Shielding Factor Uncertainty	Erosion-Rate Uncertainty	Conc. 10Be Uncertainty	Conc. 26Al Uncertainty	Attenuation Length Uncertainty	Depth to Top of Sample Uncertainty	Year Collected Uncertainty
		(DD)	(DD)	(masl)		flag	(cm)	(g/cm3)	correction	(mm/kyr)	(atoms/g)	standard	(atoms/g)	standard	(g/cm2)	(g/cm2)	(year A.D.)	decimal degrees	decimal degrees	meters	hPa	cm	g/cm^3	unitless	mm/kyr	Atoms/g of sample	Atoms/g of sample	g/cm^2	g/cm^2	Year A.D.		CRONUScalc RESULTS
Eightmile moraine (10Be)																																Sample Name	Age (Be)	Total Uncertainty (Be)	Erosion Rate	Scaling Be Spallation	Scaling Fast Muons (Be)	Scaling Slow Muons (Be)	Production Be Spallation	Production Muon Spallation (Be)	Qs (Be)	Qmu (Be)	Analytical (Internal) Uncertainty (Be)
8-A2	SA	45.432	-110.7	1548		Elevation	1	2.7	1	0	193929	NIST_Certified	0	KNSTD		0	1997	0	0	0	0	0	0	0	0	14544.7	0	0	0	0		8-A2	14.5	1.5	0	3.6747	1.9217	1.9217	14.2797	0.11692	0.99139	0.99864	0.95908
58-GVLCI2-36-1	SA	38.3814	-116.072	1818		Elevation	5	2.65	0.896	0	943390	NIST_Certified	1	KNSTD		0	2011	0	0	0	0	0	0	0	0	23077.4	0	0	0	0
58-GVLCI2-36-2	SA	38.3814	-116.072	1818		Elevation	2.5	2.65	0.896	0	590531	NIST_Certified	2	KNSTD		0	2011	0	0	0	0	0	0	0	0	13505.3	0	0	0	0
58-GVLCI2-37-1	SA	38.371	-116.064	1843		Elevation	1.5	2.65	1	0	426406	NIST_Certified	3	KNSTD		0	2011	0	0	0	0	0	0	0	0	10843.4	0	0	0	0
58-GVLCI2-38-1	SA	38.3888	-116.069	1838		Elevation	2	2.65	1	0	293170	NIST_Certified	4	KNSTD		0	2011	0	0	0	0	0	0	0	0	11228	0	0	0	0

## Sheet: CRONUS Calc results
Sample Name	Age (Be)	Total Uncertainty (Be)	Erosion Rate	Scaling Be Spallation	Scaling Fast Muons (Be)	Scaling Slow Muons (Be)	Production Be Spallation	Production Muon Spallation (Be)	Qs (Be)	Qmu (Be)	Analytical (Internal) Uncertainty (Be)	Age (Al)	Total Uncertainty (Al)	Erosion Rate	Scaling Al Spallation	Scaling Fast Muons (Al)	Scaling Slow Muons (Al)	Production Al Spallation	Production Muon Spallation (Al)	Qs (Al)	Qmu (Al)	Analytical (Internal) Uncertainty (Al)
58-GVLCI2-36-1	73.7	5.9	0	4.1124	2.0262	2.0262	13.8488	0.10911	0.9592	0.98817	1.4961	1.0032e-05	1.1e-06	0	4.0272	2.0262	2.0262	98.6011	1.0755	0.9592	0.98746	0
58-GVLCI2-36-2	44.7	4.4	0	4.1124	2.0262	2.0262	14.1422	0.10994	0.97932	0.99569	0.78728	1.9651e-05	2.1e-06	0	4.0272	2.0262	2.0262	100.69	1.0842	0.97932	0.99546	0
58-GVLCI2-37-1	29.3	2.2	0	4.1902	2.0516	2.0516	16.2186	0.12424	0.98752	0.99754	0.90667	2.5713e-05	2.7e-06	0	4.1025	2.0516	2.0516	115.447	1.2258	0.98752	0.99741	0
58-GVLCI2-38-1	21	1.6	0	4.1755	2.0469	2.0469	16.0936	0.1239	0.98341	0.99674	0.35144	3.4547e-05	3.7e-06	0	4.0882	2.0469	2.0469	114.562	1.2223	0.98341	0.99658	0
58-GVLCI2-36-1	73.7 ± 5.9		±
58-GVLCI2-36-2	44.7 ± 4.4		±
58-GVLCI2-37-1	29.3 ± 2.2		±
58-GVLCI2-38-1	21 ± 1.6		±

## Sheet: Table
	Table 1
	10Be sample data and ages.
	Sample	Sample type	Latitude (°N)	Longitude (°W)	Elevation (m asl)	Sample thickness (cm)	Topographic shielding factor	Quartz (g)	9Be (μg)	10Be/9Be ratio (x1013)	10Be concentration (x105 atoms g-1)	10Be age (ka)
	58-GVLCI2-36-1	crater bedrock	38.3814	116.072	1818	5	0.896	22.6698	0.242916	1.32 ± 0.32	9.43 ± 0.23	73.7 ± 5.9
	58-GVLCI2-36-2	crater bedrock	38.3814	116.072	1818	2.5	0.896	14.8357	0.242591	5.40 ± 0.12	5.91 ± 0.14	44.7 ± 4.4
	58-GVLCI2-37-1	ejecta boulder	38.371	116.064	1843	1.5	1	19.7901	0.244213	5.17 ± 0.13	4.26 ± 0.11	29.3 ± 2.2
	58-GVLCI2-38-1	ejecta boulder	38.3888	116.069	1838	2	1	8.7886	0.243686	1.58 ± 0.06	2.9 3± 0.11	21 ± 1.6
	Notes: All samples with a rock density of 2.65 g/cm3; zero rock surface erosion. Ages calculated using global production rate of Borchers et al. (2015) with LSD scaling from Lifton et al. (2014);
	Scaling choice is "SA" and ages caluclated on this website: http://web1.ittc.ku.edu:8888/2.0/ (Marrero et al., 2016).
